# Supplementary material
Source: PubMed Central journal article supplement (PMC8749692)
Supplement: jamainternmed-e217556-s001.pdf [file jamainternmed-e217556-s001.pdf]

1 **Background:**

2 There are 4 overnight hospitalisations for every 10 older Australians each year [1], and a  
3 hospital stay is often a decisive turning point in an older persons' health [2]. Regardless of  
4 the reason for hospitalisation, older patients are at high risk of leaving hospital worse, not  
5 better. Geriatric syndromes--deterioration in physical performance and independence,  
6 nutritional status and mental state--predispose to poor hospital outcomes including falls,  
7 pressure injury, longer hospital stays and nursing home placement, and may take months to  
8 improve [2-4]. The cost to the health system is enormous; for example the costs of delirium  
9 are estimated to be greater than the health system costs for diabetes [5, 6].

10 Better hospital care can reduce these adverse impacts [2, 7-10]. Embedding several crucial  
11 practices (support of early ambulation and independence, support of oral nutrition and  
12 hydration, and individual/group activities for cognitive stimulation) can reduce delirium and  
13 functional decline and improve outcomes. Specialised acute care for elders wards are one  
14 effective model to deliver these practices [11-14], but with more than half of hospital bed  
15 days occupied by elders such highly specialised wards offer a solution for only a few. We  
16 must expand the principles of good geriatric care to all hospital wards caring for elders [15].

17 There has been increasing international interest in this problem, with several recently  
18 published research protocols and studies addressing poor nutrition, poor mobility and  
19 delirium in general ward populations [16-22]. Observational studies demonstrate complex  
20 patient, staff and system barriers to apparently simple practices such as mobility, nutrition  
21 and cognitive activities in acute wards [23-31]. The challenges of translating evidence into  
22 practice change in complex systems are increasingly recognised. Successful change  
23 requires a tailored approach which takes into account the evolving evidence, the local  
24 context (including culture, leadership, politics and resources), and complex individual and  
25 group dynamics and readiness to change, and which uses evidence-based tools for initiating  
26 and embedding behaviour change [32]. Few of the published studies have used an explicit  
27 implementation framework [20, 33], and most have focussed on providing protocol care to  
28 individual patients rather than considering wider systems interventions [15].

29 We have piloted "Eat Walk Engage" as an evidence-based system redesign model to  
30 improve care of older patients on two wards at the Royal Brisbane and Women's Hospital.  
31 We have used an enabling facilitation approach guided by the PARIHS framework  
32 (Promoting Action on Research Implementation in Health Services) [34, 35], with facilitation  
33 strategies including: engaging directly with patients to be responsive to their needs and  
34 priorities; facilitating clinicians leaders to make practice changes at ward level; involving the  
35 teams in meaningful data collection and feedback; investigating affordable solutions to  
36 workforce and environmental challenges; and aligning organisational governance, training,  
37 and data monitoring with these changes to ensure sustainability. We have demonstrated  
38 improvements in processes of care and reduction in hospital bed use in our before-after  
39 evaluations [36]. Average acute length of stay for patients aged 65 and older fell from 9 days  
40 to 6 days on the medical ward, and 8.5 days to 7.5 days on the vascular ward (unpublished  
41 data), a bed day saving valued at more than \$2 million per year. The proportion of patients  
42 able to directly discharged home without a continuing "subacute" care stay increased by  
43 15% on the medical ward, and by 20% on the vascular ward, meaning that 250 more  
44 patients each year do not require a continuing stay. We saw promising trends to reductions

45 in reported falls and pressure injuries on the intervention wards. Patients reported they were  
 46 more likely to walk, receive help at mealtimes, and have things to keep their mind active.  
 47 However, the wider application of these findings is hampered by the single institution  
 48 location, the before-after study design, and limited qualitative information to understand key  
 49 factors in intervention success.

50 CHERISH will build on these promising pilot findings, conducting multi-methods research  
 51 within a randomised controlled trial design to investigate whether the approach is effective,  
 52 cost-effective, transferable and scalable within our health system. This approach is  
 53 consistent with the MRC Framework on Evaluation of Complex Interventions in Healthcare  
 54 [37]. Our strong multidisciplinary team of researchers and clinicians will combine expertise in  
 55 health system redesign, geriatric care, complex research methods and economic analysis.  
 56 We have partnership support from 2 major hospital and health services and will engage with  
 57 their clinical and executive leaders to adapt and refine our implementation approach.  
 58 Partnering with the Queensland Government and hospital and health services will engage  
 59 policy and decision makers in the research process and assist the translation of findings into  
 60 policy and practice. Strong links with other major quality initiatives in aged care, notably the  
 61 Hospital Elder Life Program (HELP, Professor Inouye), the NHMRC Cognitive Decline  
 62 Partnership Centre (CDPC, Professor Kurrle) and the National Ageing Research Institute  
 63 (NARI, Dr Blackberry) will allow sharing of resources and dissemination of findings.

64 **Design:** A cluster-randomised controlled trial, with participants randomised to usual care or  
 65 the “Eat Walk Engage” implementation model based on their admission ward (cluster). Each  
 66 participating hospital will nominate two potential wards, which will be randomised to  
 67 intervention or control (see diagram below). Data will be collected for patients in months 1–6  
 68 (baseline) and months 19–24 (post-implementation). This allows changes in outcomes in  
 69 intervention wards after the implementation to be compared to changes in control wards,  
 70 controlling for system-wide changes unrelated to the intervention.

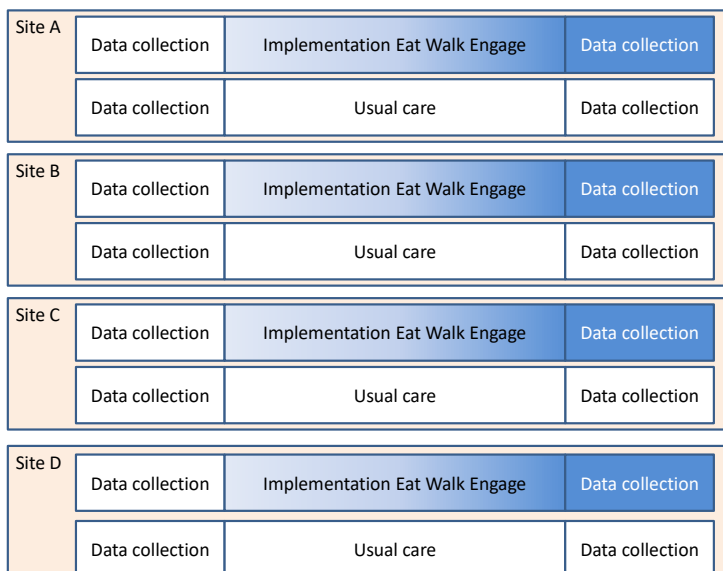

71

72 **Aims and hypotheses:**

73 CHERISH will investigate whether Eat Walk Engage is an effective, cost-effective and  
74 transferable model for implementing improved care of older inpatients.

75 Specifically, we hypothesise that comparing patient outcomes on the intervention wards  
76 during baseline and post-implementation periods, we will see:

- 77
- 78 • 10% greater reduction in length of hospital stay
  - 79 • 10% greater increase in discharge directly home
  - 80 • Significant reduction in geriatric complications of hospitalisation (delirium, functional decline, falls, incontinence, pressure injury); and
  - 81 • Significantly greater participation in target activities (nutrition, ambulation, social and  
82 cognitive engagement);
- 83 compared to control ward changes during the same period

84

85 **Sites and intervention:**

86 Four hospitals (Prince Charles, Caboolture, Brighton and Nambour) will provide wards for  
87 the study, providing a mix of metropolitan, community, and regional hospitals. Eligible wards  
88 may be medical or surgical wards with at least 50% bed days occupied by patients aged  
89 over 65 (based on analysis of local administrative data). Two wards prepared to participate  
90 will be identified for each participating hospital. To optimise potential benefits of this  
91 programme, choice will be in consultation with key executive and clinical staff at the hospital,  
92 and will be informed by patient characteristics (number of older patients on each ward,  
93 current length of stay patterns for older patients, and patterns of monitored adverse events  
94 such as falls and pressure injury), as well as executive preferences, ward leadership and  
95 engagement, and avoiding cross-contamination (e.g., wards which share a large number of  
96 medical or allied health professional staff would not be ideal as a control–intervention pair).  
97 Nominated ward characteristics will be reviewed by the Chief Investigator and statistician  
98 and sorted into two groups (each with one ward from each hospital) to optimise the spread of  
99 case-mix (e.g., avoiding distributing all surgical wards to one group). These two groups will  
100 then be randomised by a computer generated random number, providing an intervention and  
101 control ward at each hospital. Randomising each pair of wards runs individually risks  
102 creating large differences between the control and intervention groups because of the small  
103 number of hospitals.

104 **Control wards** will continue with usual clinical care. Process and outcome data collection  
105 (described below) will be undertaken on both the intervention and control wards, during the  
106 first 6 months and last 6 months of the project. This information will not be provided back to  
107 control unit staff at the time, to avoid influencing control staff behaviour. However, at project  
108 completion these data will be summarised and provided to clinical and executive staff as a  
109 measure of ward performance, providing a starting point for post-project rollout of the model  
110 on control units if this is considered appropriate by the organisation. Implementation and  
111 evaluation of this post-project phase is outside the current project scope. Organisational  
112 reporting and feedback of efficiency measures (e.g., length of stay) and quality and safety  
113 measures (e.g., falls, pressure injuries) will continue through usual mechanisms.

114 **Intervention wards** will implement the “Eat Walk Engage” programme which supports  
115 development of local strategies to improve nutrition, early mobilisation, and cognitive  
116 stimulation for older inpatients. It consists of three linked components which will be tailored  
117 to each intervention site:

- 118 1. an evidence-based facilitation approach to optimise strategy uptake and sustainability;
- 119 2. a suite of tailored clinical and system strategies (including education, task reallocation  
120 and system and environmental redesign) developed through an iterative process of  
121 process measurement, solution development and testing, and performance feedback  
122 3. use of a trained assistant work force.

123 Facilitation: At each site a clinically experienced implementation leader (facilitator) will be  
124 recruited, trained in enabling facilitation, and supported by the central project team, local  
125 clinical champions and executive sponsor(s). Barriers and enablers to implementation will be  
126 assessed through group and individual discussions with multidisciplinary ward staff and  
127 other key clinical and executive staff, guided by the PARIHS framework (Promoting Action  
128 on Research Implementation in Health Services) and informed by findings of baseline  
129 process measures and patient interviews [34, 35]. Brief minutes will be provided to  
130 participating staff to check accuracy of interpretation and as a record of discussions.  
131 Information from these sources will guide the enabling facilitation approach to redesign of  
132 care. In the intervention group, repeat discussions with key informants including clinical and  
133 executive champions and the local facilitators at the end of implementation will help to  
134 understand their perceptions of implementation success and reasons for success or failure.

135 Tailored intervention strategies: Process measures to capture the local patient experience  
136 will be undertaken at project commencement, including patient interviews, meal-time audits  
137 and behavioural mapping (described below), providing rich data on baseline performance for  
138 the team. Information available from existing hospital data collection systems (including  
139 incident reporting such as falls and pressure injuries) and relevant information collected  
140 during staff interviews will also be summarised for feedback. The local facilitator will work  
141 with a multidisciplinary team (MDT) of clinical staff on each intervention ward to review  
142 performance (in the areas of nutrition, mobility and cognitive activities), prioritise areas for  
143 improvement and develop potential solutions. Tailored education and training of ward staff  
144 will be provided by the facilitator using materials developed in the US Hospital Elder Life  
145 Program and the Victorian Government Toolkit “Best Care for Older People Everywhere”,  
146 adapted as required by the central project team in collaboration with the developers. Task  
147 analysis with the MDT, informed by baseline data, will allow redesign of systems (e.g.  
148 change in medication time to avoid clash with meals), reallocation of staff time (e.g. using  
149 therapy time to supervise a group activity), advocating for simple environmental redesign  
150 (e.g. providing a walking destination with seating and reading material) and/or delegation of  
151 appropriate tasks to an assistant. Monthly MDT meetings led by the facilitator and ad hoc  
152 support will allow staff to reflect on solutions and refine or discard them, identify new barriers  
153 and develop new solutions. Brief minutes of these formal meetings, along with field notes  
154 from time spent on the ward, will be collected to assist the facilitators and MDT reflect on  
155 and adapt their interventions. The facilitator will help escalate persistent barriers to the  
156 executive sponsors if required. This action research process will be supported by periodic  
157 process measurement and feedback to the MDT tailored to the selected strategies.

158 Trained assistant workforce: Healthcare assistants may include allied health assistants or  
159 nursing assistants with a certificate IV qualification and appropriate clinical experience. One  
160 half-time assistant will be recruited for each intervention ward as part of the project, when  
161 optimal task delegation strategies have been identified by the MDT. Assistants will attend  
162 two weeks of training in Eat Walk Engage strategies delivered by members of the project  
163 team in collaboration with their local work-place supervisor and the local facilitator (see  
164 above). Training in delegation will be provided to assistants and staff members delegating to  
165 them, aligned with appropriate professional standards and with particular emphasis on the  
166 target areas of nutrition, mobility and cognition.

167 **Participants:**

168 Participants in this multi-methods research project will include:

- 169 1. All consecutive inpatients aged 65 or older discharged from intervention and control  
170 wards in the pre-implementation period (months 1–6) and the post-implementation  
171 period (months 19–24). Data will be obtained from existing administrative databases  
172 in each facility for length of stay; discharge destination (home, higher level of care,  
173 subacute care, inter-facility transfer or death); and adverse events (pressure injuries,  
174 falls) for all patients. Estimating 250-400 older discharges per ward per 6 months, we  
175 anticipate 1000-1600 patients in each of control and intervention groups for each  
176 period (pre-implementation and post-implementation).
- 177 2. Sample of consecutive consenting older inpatients admitted for 3 days or more for  
178 detailed clinical data collection of secondary outcomes (see below), sampled from  
179 each ward during the baseline and post-implementation periods. Our previous  
180 studies in medical and surgical wards suggest that this approach enrolls 30–50% of  
181 older patients; we will aim to recruit 100 participants per ward per study period (i.e.  
182 400 for each of control and intervention groups for each period, or 1600 participants).
- 183 3. Sample of consenting older inpatients admitted for 3 days or more for brief structured  
184 interview (estimated 10 per ward per period, or total 200 interviews) exploring patient  
185 experience of key domains (mobility, nutrition, cognitive activities) including barriers  
186 and enablers
- 187 4. Staff participants, including implementation team, multidisciplinary team and  
188 executive staff supporting the project . Discussions with staff based on the themes of  
189 the PARIHS framework are key to understanding context, engaging staff and  
190 adapting interventions as part of an “action research” framework, and forms and  
191 integral part of the “Eat Walk Engage” implementation programme [36]. Information  
192 will be captured in field notes and meeting minutes.

193

194

195 **Measures:**

196 Primary outcomes will be length of stay and direct discharge to home/usual care, collected  
197 routinely within the hospital administrative dataset and available for all patients aged 65 and  
198 older discharged from the study wards during the study periods.

199 Secondary outcomes will be geriatric complications (including functional decline, delirium,  
200 falls, pressure injury and incontinence) and clinical outcomes obtained by clinical  
201 assessment and structured chart review in a consecutive sample of consenting participants  
202 on each ward. Participants will be patients aged 65 and older with a length of stay on the  
203 study ward of 3 days or more who are willing and able to provide consent (or have a suitable  
204 proxy able to provide consent to participation).

- 205 • Functional decline will be defined as any increase in the number of basic activities of  
206 daily living for which the patient requires human assistance [38]. Using the comparator of  
207 pre-morbid baseline (2 weeks prior to admission), functional decline will be calculated at  
208 day 5, discharge and 30 days after discharge (telephone) and will be obtained by patient  
209 report supplemented if necessary by proxy (relative or nurse) report.
- 210 • Delirium will be identified at the first visit by cognitive testing using brief cognitive  
211 screening and the Confusion Assessment Method (3DCAM), undertaken by a trained  
212 clinical research officer. New onset of delirium will be identified using a combination of  
213 clinical re-assessment twice per week plus use of the chart-based Confusion  
214 Assessment Method applied to clinical notes (medical record and nursing care plans) at  
215 the end of the episode of care [39].
- 216 • Falls and pressure injury will be identified from nursing and medical records cross-  
217 checked with organisational adverse event reporting systems.
- 218 • Incontinence will be identified from medical records and nursing care plans, with pre-  
219 existing incontinence identified from patient report as part of the baseline functional  
220 assessment.

221 Clinical outcomes will include hospital utilisation including length of acute ward stay, any  
222 subsequent rehabilitation or transfer length of stay until true discharge from hospital; and any  
223 readmitted hospital stay within 6 months of the index admission; and discharge destination  
224 from total hospital stay (home or residential care).

225 Descriptive patient characteristics extracted from the record will include age, sex, usual  
226 residence, primary diagnosis, comorbidities, and hospitalisation in the previous 6 months.  
227 This will be supplemented by standardised screening of admission functional status (need  
228 for assistance in activities of daily living), cognition (Abbreviated Mental Test) and nutritional  
229 status (Malnutrition Screening Tool) by the research officer at the time of patient consent,  
230 within 2 days of admission. Frailty [40] will be defined in two ways: a brief screen defined as  
231 presence of one or more of functional, cognitive and nutritional impairment on admission  
232 (identifying patients likely to benefit from Eat Walk Engage interventions); and a  
233 comprehensive frailty index based on Rockwood's approach and validated in inpatients [41,  
234 42]. Patient descriptive data will be used to ensure the comparability of the intervention and  
235 control groups and of the two data collection points. Summary statistics will be tabulated to  
236 compare between the groups.

237 Cost-effectiveness will be from the perspective of the health care system and changes to  
238 costs will consider implementation costs (project, clinical and management staff time,

239 consumables and overheads) and cost savings from shorter stays, fewer complications and  
240 other savings. Health benefits will be assessed using a preference based utility score  
241 (EQ5D) administered at discharge (face-to-face) and 30 days (telephone) after discharge in  
242 consenting participants in both groups, enabling estimation of quality adjusted life years  
243 gained. The questionnaire will be administered by a research assistant blind to intervention  
244 status.

245 Process measures will provide baseline data and identify the impact of the intervention on  
246 processes of care.

- 247 • Patient interviews will be conducted with 10 consenting participants per ward using a  
248 brief (< 10 minutes) semi-structured interview tool addressing the experience of activities  
249 related to nutrition, mobility and cognition on the day of interview; perceived importance  
250 of participation; and barriers and enablers to greater participation. Interviews will be  
251 audio-recorded in de-identified form as well as on paper to capture qualitative comments.
- 252 • Documentation review will include identification and audit of nursing risk assessment and  
253 care planning documentation related to nutrition, mobility and cognition and will be  
254 identified through medical record extraction in consenting patients.
- 255 • Meal-time audits include structured observation of the mealtime environment for each  
256 older patient on the study ward for 6 meals per ward. Observations include ward level  
257 data (staff numbers at meal time, concurrent clinical activities, meal delivery and pick up  
258 times) as well as individual patient level data (tray table set-up, patient set-up, timely  
259 patient assistance, and type of meal provided). Data collection uses a structured data  
260 collection form, and sequential patient observation before and following meal delivery.
- 261 • Behavioural mapping [43]. This is a method of systematic sampling of patient activities  
262 across 4 domains [location (bedroom, bathroom, hall, off ward), physical position (in bed,  
263 sitting, standing, walking), activity (resting, cares, self-care, eating, reading, TV, games,  
264 exercising) and company (alone, with staff, with visitors). Observations are undertaken  
265 using a consistent room sequence and at fixed time intervals, with each patient observed  
266 for a 2 minute interval several times per hour for a 4 hour interval. The average  
267 percentage of time spent in each level of each domain is calculated. Physical activity  
268 observations correlate with direct activity measurement using accelerometry. The  
269 method measures a variety of activities relevant to the aims of this project, and patterns  
270 of staff interaction with older patients.
- 271 • Assistant interventions. Records of all health care assistant interventions documented in  
272 the medical and nursing records will be extracted using chart review. This will help to  
273 describe the reach and scope of the assistant workforce intervention.

274 While blinding of staff and participants is not possible, data will be collected by a clinically  
275 trained research officer who is not involved in developing or delivering interventions, or in  
276 design or analysis of the study. Project officers will be trained and supervised by the project  
277 management team. Data will be entered and analysed by the project management team,  
278 and de-identified results of process measures provided to the sites to support  
279 implementation strategies.

280

281 **Analysis:**

282 Outcomes will be measured and analysed at a patient level, allowing for clustering by ward.  
283 Patient, ward and group characteristics will be described using summary statistics. Change  
284 in average length of stay will be compared between the intervention and control group using  
285 time-to-event analysis. Competing outcomes will be included to explore the impact on acute  
286 length of stay and discharge destination from acute stay (death/home/subacute or residential  
287 care) [44]. Participants who are still in-hospital at the end of study will be censored. The  
288 primary outcomes will be presented as: i) the average difference in length of stay, ii) the  
289 percentage change in discharge home. Outcomes will be presented as means or proportions  
290 and 95% confidence intervals. Plots of the cumulative risks of discharge by length of hospital  
291 stay will be compared between groups to examine the differences between groups in detail  
292 and to show whether the intervention effect varies by time in hospital.

293 The estimated sample size will provide 90% power to detect a difference of 10% in acute  
294 length of stay and discharge home. Proportions of participants developing secondary  
295 outcomes (e.g., geriatric syndromes) will be compared between groups using chi-squared  
296 testing. Modelling approaches (such as multiple logistic regression) will be used if needed to  
297 adjust for intergroup baseline differences, however we anticipate that the randomised design  
298 will protect against any confounding. Planned subgroup analysis of outcomes will be  
299 undertaken to identify effect at different sites and in frail versus non-frail participants.

300 Processes of change from staff and patient perspective as well as direct measurement of  
301 observable care processes will provide information regarding intervention fidelity, barriers  
302 and enablers. Pre-implementation interviews with patients will be analysed using a mixed  
303 methods approach, with descriptive statistics for dichotomous or scale response questions,  
304 and thematic analysis of open-ended interview questions. Interview themes supported by  
305 examples will be provided in feedback to staff supplementing the objective process  
306 measures, as illustrative individual narratives can provide powerful motivation for change.  
307 Post-implementation interviews will help to identify barriers and success factors for  
308 implementation. Process measures (e.g. proportion of patient time spent standing or  
309 walking) will be measured and reported at a ward level.

310 Cost-effectiveness will be assessed by modelling the change to total costs and total health  
311 benefits, with uncertainties included. The cost per quality adjusted life year gained from  
312 wider adoption of the programme will also be estimated.

313 A participant flow diagram will be used to show: the number of participants initially assigned  
314 to each group, the number consenting to additional data collection and the losses to follow-  
315 up for secondary outcomes. Difference in consent and losses will be compared between  
316 groups using cross-tabulations and chi-squared tests.

317 All analysis will use an intention-to-treat approach, i.e. patients will be analysed as being part  
318 of the intervention group even if they did not receive specific interventions.

319



320 **References:**

- 321 [1] Australian Institute of Health and Welfare. Older Australians in hospital. Canberra:  
322 AIHW; 2007.
- 323 [2] Covinsky K, Pierluzzi E, Johnston C. Hospitalization-associated disability. "She was  
324 probably able to ambulate, but I'm not sure". JAMA. 2011;306(16):1782-93.
- 325 [3] Buurman B, Hoogerduijn J, de Haan R, Abu-Hanna A, Lagaay A, Verhaar H, et al.  
326 Geriatric conditions in acutely hospitalized older patients: prevalence and one-year survival  
327 and functional decline. PLoS One. 2011;6(11):e26951.
- 328 [4] Inouye S, Studentski S, Tinetti M, Kuchel G. Geriatric syndromes: clinical, research  
329 and policy implications of a core geriatric concept. J Am Geriatr Soc. 2007;55(5):780-91.
- 330 [5] Leslie D, Inouye S. The importance of delirium: economic and societal costs. J Am  
331 Geriatr Soc. 2011;59(Suppl2):S241-3.
- 332 [6] Leslie D, Marcantonio E, Zhang Y, Leo-Summers L, Inouye S. One-year health care  
333 costs associated with delirium in the elderly population. Arch Intern Med. 2008;168(1):27-32.
- 334 [7] Inouye S, Acampora D, Miller R, Fulmer T, Husrt L, Cooney L. The Yale Geriatric  
335 Care Program: a model of care to prevent functional decline in hospitalized elderly patients.  
336 J Am Geriatr Soc. 1993;41:1345-52.
- 337 [8] Kleinpell R, Fletcher K, Jennings B. Reducing functional decline in hospitalized  
338 elderly. In: Hughes R, ed. *Patient safety and quality: an evidence-based handbook for*  
339 *nurses*. Rockville (MD): Agency for Healthcare Research and Quality 2008.
- 340 [9] Lundstrom M, Edlund A, Karlsson S, Brannstrom B, Bucht G, Gustafson Y. A  
341 multifactorial intervention program reduces the duration of delirium, length of hospitalization  
342 and mortality in delirious patients. Journal of the American Geriatrics Society. 2005;53:622-  
343 8.
- 344 [10] Mudge A, Giebel A, Cutler A. Exercising body and mind:an integrated approach to  
345 functional independence. Journal of the American Geriatrics Society. 2008;56:630-5.
- 346 [11] Bachmann S, Finger C, Huss A, Egger M, Stuck A, Clough-Gorr K. Inpatient  
347 rehabilitation specifically designed for geriatric patients: systematic review and meta-analysis  
348 of randomised controlled trials. BMJ. 2010;340:c1718.
- 349 [12] Baztan JJ, Suarez-Garcia FM, Lopez-Arrieta J, Rodriguez-Manas L, Rodriguea-  
350 Artalejo F. Effectiveness of acute geriatric units on functional decline, living at home, and  
351 case fatality among older patients admitted to hospital for acute medical disorders: meta-  
352 analysis. BMJ. 2009;338:b50.
- 353 [13] Flood K, MacLennan P, McGraw D, Green D, Dodd C, Brown C. Effects of an acute  
354 care for elders unit on costs and 30-day readmissions. JAMA Intern Med.  
355 2013;doi:10.1001/jamainternmed.2013.524.
- 356 [14] Fox M, Persaud M, Maimets I, O'Brien K, Brooks D, Tregunno D, et al. Effectiveness  
357 of acute geriatric care unit using Acute Care for Elders components: a systematic review and  
358 meta-analysis. J Am Geriatr Soc. 2012;60:2237-45.
- 359 [15] Bakker F, Robben S, Olde Rikkert M. Effects of hospital-wide interventions to  
360 improve care for frail older inpatients: a systematic review. BMJ Qual Saf. 2011;20:680-91.
- 361 [16] Bakker F, Persoon A, Bredie S, van Haren-Willems J, Leferink V, NOyez L, et al. The  
362 Carewell in Hospital program to improve the quality of care for frail elderly inpatient: results  
363 of a before-after study with particular focus on surgical patients. Am J Surg. 2014(in press).
- 364 [17] Chen C, Lin M, Tien Y, Yen C, Huang G, Inouye S. Modified Hospital Elder Life  
365 Program: effects on abdominal surgery patients. J Am Coll Surg. 2011;213:245-52.

- 366 [18] Fleck S, Bustamante-Ara N, Vidan M, Lucia A, Serra-Rexach J. Activity in Geriatric  
367 acute CARE (AGECAR): rationale, design and methods. *BMC Geriatrics*. 2012;12:28.
- 368 [19] Harari D, Hopper A, Dhesi J, Babic-Illman G, Lockwood L, Martin F. Proactive care of  
369 older people undergoing surgery('POPS'): designing, embedding, evaluating and funding a  
370 comprehensive geriatric assessment service for older elective surgical patients. *Age Ageing*.  
371 2007;36:190-96.
- 372 [20] Kitson A, Schultz T, Long L, Shanks A, Wiechula R, Chapman I, et al. The  
373 prevention and reduction of weight loss in an acute tertiary care setting: protocol for a  
374 pragmatic stepped wedge randomised cluster trial (the PROWL project). *BMC Health  
375 Services Research*. 2013;13:299.
- 376 [21] Mouchoux C, Rippert P, Duclos A, Fassier T, Bonnefoy M, Comte B, et al. Impact of  
377 a multifaceted program to prevent postoperative delirium in the elderly: the CONFUCIUS  
378 stepped wedge protocol. *BMC Geriatrics*. 2011;11:25.
- 379 [22] Srijbos M, Steunenbergh B, van der Mast R, Inouye S, Schuurmans M. Design and  
380 methods of the Hospital Elder Life Program (HELP), a multicomponent targeted  
381 intervention to prevent delirium in hospitalized older patients: efficacy and cost-effectiveness  
382 in Dutch health care. *BMC Geriatrics*. 2013;13:78.
- 383 [23] Boltz M, Capezuti E, Shabbat N. Nursing staff perceptions of physical function in  
384 hospitalized older adults. *App Nurs Res*. 2011;24:215-22.
- 385 [24] Brown C, Williams B, Woodby L, Davis L, Allman R. Barriers to mobility during  
386 hospitalization from the perspectives of older patients and their nurses and physicians. *J  
387 Hosp Med*. 2007;2(305-313).
- 388 [25] Doherty-King B, Bowers B. Attributing the responsibility for ambulating patients: a  
389 qualitative study. *International Journal of Nursing Studies*. 2013;50(9):1240-6.
- 390 [26] Kondrup J, Johansen N, Plum L, Bak L, Larsen I, Martinsen A, et al. Incidence of  
391 nutritional risk and causes of inadequate nutritional care in hospitals. *Clin Nutr*. 2002  
392 Dec;21(6):461-8.
- 393 [27] Mudge A, Ross L, Young A, Isenring E, Banks M. Helping understand nutritional  
394 gaps in the elderly (HUNGER): a prospective study of patient factors associated with  
395 inadequate nutritional intake in older medical inpatients. *Clin Nutr*. 2011 Jun;30(3):320-5.
- 396 [28] So C, Pierluzzi E. Attitudes and expectations regarding exercise in the hospital of  
397 hospitalized older adults: a qualitative study. *J Am Geriatr Soc*. 2012;60:713-8.
- 398 [29] Ross LJ, Mudge AM, Young AM, Banks M. Everyone's problem but nobody's job:  
399 Staff perceptions and explanations for poor nutritional intake in older medical patients.  
400 *Nutrition & Dietetics*. 2011;68(1):41-6.
- 401 [30] Yevchak A, Fick D, McDowall J, Monroe T, May K, Grove L, et al. Barriers and  
402 facilitators to implementing delirium rounds in a clinical trial across three diverse hospital  
403 settings. *Clinical Nursing Research*. 2014;23:201.
- 404 [31] Yevchak A, Steis M, Diehl T, Hill N, Kolanowski A, Fick D. Managing delirium in the  
405 acute care setting: a pilot focus group study. *Int J Older People Nurs*. 2012;7:152-62.
- 406 [32] Grol R, Bosch M, Hulscher M, Eccles M, Wensing M. Planning and studying  
407 improvement in patient care: the use of theoretical perspectives. *Milbank Quarterly*.  
408 2007;85(1):93-138.
- 409 [33] Godfrey M, Smith J, Green J, Cheater F, Inouye S, Young J. Developing and  
410 implementing an integrated delirium prevention system of care: a theory driven, participatory  
411 research study. *BMC Health Services Research*. 2013;13:341.

- 412 [34] Stetler C, Damschroder L, Helfrich C, Hagdorn H. A guide for applying a revised  
413 version of the PARIHS framework for implementation. *Implementation Science*. 2011;6.
- 414 [35] Kitson A, Rycroft-Malone J, Harvey G, McCormack B, Seers K, A T. Evaluating the  
415 successful implementation of evidence into practice using the PARIHS framework:  
416 theoretical and practical challenges. *Implementation Science*. 2008;3:1.
- 417 [36] Mudge A, McRae P, Cruickshank M. Eat Walk Engage: and itnerdisciplinary  
418 collabroative model to improve care of hospitalized elders. *Am J Med Qual* 2015; 30 (1): 5-  
419 13.
- 420 [37] Craig P, Dieppe P, Macintyre S, Michie S, Nazareth I, Petticrew M. Developing and  
421 evaluating complex interventions: the new Medical Research Council guidelines. *BMJ*.  
422 2008;337:a1665.
- 423 [38] Mudge A, O'Rourke P, Denaro C. Timing and risk factors for functional changes  
424 associated with medical hospitalization in older patients. *J Gerontol A Med Sci Biol Sci*  
425 2010;65(8):866-72.
- 426 [39] Saczynski J, Kosar C, Xu G, Puelle M, Schmitt E, Jones R, et al. A tale of two  
427 methods: chart and interview methods for indetifying delirium. *J Am Geriatr Soc*.  
428 2014;62:518-24.
- 429 [40] Clegg A, Young J, Rikkert MO, Rockwood K. Frailty in elderly people. *Lancet*.  
430 2013;381:752-62.
- 431 [41] Evans S, Sayers M, Mitnitski A, Rockwood K. The risk of adverse outcomes in  
432 hospitalized older patients in realtion ot a frailty index based on a comprehensive geriatric  
433 assessment. *Age Ageing*. 2014;43:127-32.
- 434 [42] Krishnan M, Beck S, Havelock W, Eeles E, Hubbard RE, Johansen A. Predicting  
435 outcome after hip framcure: using a frailty index to integrate comprehensive geriatric  
436 assessment results. *Age Ageing* 2014;43:122-6.
- 437 [43] Kuys S, Dolecka U, Guard A. Activity level of hospital medical inpatients: an  
438 observational study. *Arch Gerontol Geriatr*. 2012;55:417-21.
- 439 [44] Wolkewitz M, Cooper BS, Bonten MJM, Barnett AG, M S. Interpreting and comparing  
440 risks in the presence of competing events. *BMJ*. 2014;349:g5060.
- 441
- 442
