# Supplementary material
Source: PubMed Central journal article supplement (PMC8749692)
Supplement: jamainternmed-e217556-s002.pdf [file jamainternmed-e217556-s002.pdf]

## 1 | **CHERISH analysis plan**

2  
3 **Design:** pragmatic cluster randomised controlled trial

4  
5 **Primary comparison:** The primary comparison will use post-implementation period data on  
6 the 4 wards (general medicine, respiratory medicine, orthopaedic and general surgery)  
7 implementing Eat Walk Engage compared to 4 wards (matched for hospital: two general  
8 medicine, specialty medicine and general surgery) not implementing the program,  
9 controlling for age, gender, Charlson comorbidity score, admission ADL status and  
10 admission cognitive status (SPMSQ score) and adjusting for clustering by ward.

11 **Secondary comparison 1:** will include data from the pre-implementation cohorts as  
12 additional controls, controlling for time period. This analysis will provide greater precision to  
13 the estimates from the post-intervention comparison. This approach may induce a bias  
14 because of unrelated temporal trends in length of stay over time due to other  
15 organisational factors, which could be wrongly attributed to the program.

16 **Sensitivity analysis:** will use the primary analysis in the post-implementation cohort but  
17 include a time since intervention variable to identify whether there is an increasing effect  
18 on outcomes over the 6 month post-implementation period as the “dose” of intervention  
19 may have been increasing as the model matured. The change over time may be non-linear  
20 and therefore we will involve a range of non-linear shapes using the fractional polynomial  
21 approach<sup>1</sup>. The best fitting change over time will be estimated using the deviance  
22 information criterion (DIC).

23  
24 **Pre-specified subgroup comparisons:** will be examined using interaction terms within the  
25 primary outcome models and are:

- 26 • age under 75 years versus age 75 and older;
- 27 • frailty subgroups (less than 0.25 non-frail, 0.25-0.40 mildly frail, 0.40 and above  
28 moderately-severely frail) based on a deficit accumulation frailty index;
- 29 • the four hospitals.

### 30 **Primary outcomes:**

- 31 1. Length of stay (treating unit): described as median time to discharge and median  
32 differences between groups; analysed using Bayesian parametric survival analysis
- 33 2. Composite outcome of any “hospital associated complication of older people” (HAC-  
34 OP) which will consist of:
  - 35 a. Hospital-associated delirium (delirium documented either by assessment or  
36 chart review, first recorded more than 1 day after admission)
  - 37 b. Hospital-associated functional decline (increase in count of ADL requiring  
38 human assistance at discharge compared to 2 weeks prior to admission, by  
39 patient self-report; or in-hospital death or new residential care)
  - 40 c. Hospital-associated incontinence (urinary or faecal incontinence present at  
41 discharge which was not present 2 weeks prior to admission, by patient self-  
42 report)
  - 43

---

<sup>1</sup> P Royston, G Ambler, W Sauerbrei; The use of fractional polynomials to model continuous risk variables in epidemiology., *International Journal of Epidemiology*, Volume 28, Issue 5, 1 October 1999, Pages 964–974

- 44 d. Hospital-associated pressure ulcer (identified by patient report or chart  
45 documentation, not present at admission assessment)  
46 e. Hospital-associated fall (identified by patient report or chart documentation  
47 after admission)

48 This outcome will be modelled as a dichotomous outcome using logistic regression. Each of  
49 the five syndromes will be modelled in the same logistic regression model using a mixed  
50 model with a random intercept per participant to adjust for correlated data from the same  
51 participant. This regression model will estimate the effect of the intervention on the overall  
52 syndrome. In a sensitivity analysis we will add an interaction between the intervention and  
53 each syndrome to examine whether the intervention had a stronger effect on some  
54 syndromes. The models will control for age, gender, comorbidity score, admission ADL  
55 status and admission cognitive status (SPMSQ score) and adjust for clustering by ward.  
56

#### 57 **Secondary outcomes:**

- 58 1. Individual HAC-OP as defined above  
59 2. Death or discharge to institutional care (new residential care, continuing acute,  
60 rehabilitation or convalescent care) versus discharge home  
61 3. 30 day functional recovery (return to baseline ADL and IADL status)  
62 4. 30 day all-cause hospital readmission  
63 5. 30 day all-cause mortality  
64 3. Quality of life (EQOL5D) at 30 days  
65 4. 6 month all-cause hospital readmission  
66 5. 6 month all-cause mortality  
67

68 A “scrambled” analysis (based on simulated intervention groups) will be undertaken and  
69 shared with the investigator group for final refinement of methods before commencing full  
70 analysis. This aims to reduce the bias of making changes after the full results are available.  
71

#### 72 **Missing data:**

73 The small amount of missing data for ADL and SPMSQ at baseline will be imputed using  
74 Multivariate Imputation by Chained Equations (MICE).<sup>2</sup> This is to ensure that the maximum  
75 amount of available data are used and to help avoid selection biases caused by participants  
76 with partially missing data (e.g., sicker patients being excluded). The variables used by MICE  
77 to impute ADL and SPMSQ will be age, IADL at baseline and Charlson comorbidity index.  
78

79 We will use logistic regression to examine the missing outcome data and see what variables  
80 predict missing using treatment group, ward, age, gender, Charlson comorbidity score,  
81 admission ADL status and admission cognitive status (SPMSQ score). If strong associations  
82 exist we will use inverse-probability weighting to adjust the primary and secondary  
83 outcomes to compensate for the non-random missingness. This will be an additional  
84 sensitivity analysis.

---

<sup>2</sup> S van Buuren, K Groothuis-Oudshoorn (2011). mice: Multivariate Imputation by Chained Equations in R. Journal of Statistical Software, 45(3), 1-67.
