# Supplementary material
Source: PubMed Central journal article supplement (PMC8749692)
Supplement: jamainternmed-e217556-s004.pdf [file jamainternmed-e217556-s004.pdf]

## Data Sharing Statement

Mudge. Effect of a Ward-Based Program on Hospital-Associated Complications and Length of Stay for Older Inpatients. *JAMA Intern Med.* Published January 10, 2022.

doi:10.1001/jamainternmed.2021.7556

### Data

**Data available:** No

### Additional Information

**Explanation for why data not available:** Patient consent includes secondary use of the data for related projects to understand and improve care for older patients, involving the investigator team. Requests for use can be made through the Chief Investigator Professor Alison Mudge, and would require approval by the chief investigators and ethics board. The data analysis code is freely available.
